# Supplementary material for: Micro-Encapsulation of Phytochemicals in Passion Fruit Peel Waste Generated on an Organic Farm: Effect of Carriers on the Quality of Encapsulated Powders and Potential for Value-Addition
Source: MDPI journal article supplement (doi:10.3390/antiox11081579), 2022-08-15
Supplement: s1 [file s1]

**Table S1.** Individual phenolic and flavonoid concentration in passion fruit peel powder developed using different carriers (gum arabic, maltodextrin, and waxy starch).

| No.                   | Tentative ID                               | Retention time | M-H      | MS <sup>E</sup> Fragment ions                                                                                      | UV max   | Elemental formula                               |
|-----------------------|--------------------------------------------|----------------|----------|--------------------------------------------------------------------------------------------------------------------|----------|-------------------------------------------------|
| <b>Phenolic acids</b> |                                            |                |          |                                                                                                                    |          |                                                 |
| 1                     | Caffeic acid*                              | 1.62           | 179.0562 | <b>266.0874</b> , 215.0311, 176.0561, 104.0345, 96.9650, 74.0235                                                   | 229      | C <sub>8</sub> H <sub>3</sub> O <sub>5</sub>    |
| 2                     | 1,3-di-Caffeoylquinic acid                 | 5.29           | 515.1234 | <b>515.1203</b> , 353.0007, 341.1035, 191.0888, 179.0355, 173.0070, 135.6668, 111.0076, 89.0255                    | 229; 262 | C <sub>25</sub> H <sub>23</sub> O <sub>12</sub> |
| 3                     | 3,4-di-Caffeoylquinic acid                 | 5.48           | 515.1295 | <b>515.1351</b> , 473.1112, 353.3334, 341.1131, 335.0388, 191.0004, 179.0988, 173.0093, 135.6668, 111.0077         | 229; 274 | C <sub>25</sub> H <sub>23</sub> O <sub>12</sub> |
| 4                     | 3,5-di-Caffeoylquinic acid                 | 5.65           | 515.1205 | <b>515.1243</b> , 353.0445, 300.0888, 271.8899, 191.0999, 179.0991, 173.0996, 135.0665, 111.0071                   | 229; 274 | C <sub>25</sub> H <sub>23</sub> O <sub>12</sub> |
| 5                     | Protocatechuic acid glucoside              | 13.20          | 315.1075 | <b>243.1686</b> , 592.1250, 349.0259, 331.1505, 205.0503, 167.0382, 135.0468, 101.0243, 89.0237                    | 229      | C <sub>13</sub> H <sub>16</sub> O <sub>9</sub>  |
| 6                     | Galloyl shikimic acid di-HHDP-glucose      | 17.23          | 311.1096 | <b>311.223</b> , 179.0888, 149.8980                                                                                | 325      | C <sub>14</sub> H <sub>15</sub> O <sub>9</sub>  |
| 7                     | Hydroxy gallic acid                        | 20.77          | 187.0963 | <b>125.0929</b> , 579.4675, 332.8404, 301.0642, 257.0844, 209.0735, 190.9932, 177.0537, 113.0179, 89.0220, 59.0104 | 229      | C <sub>7</sub> H <sub>6</sub> O <sub>5</sub>    |
| 8                     | Valoneic acid                              | 21.87          | 469.2275 | <b>469.4345</b> , 315.0480, 300.0211, 277.1638, 243.0618, 159.0445, 89.0216                                        | 229      | -                                               |
| 9                     | Coumaric acid derivative                   | 26.04          | 265.1458 | <b>265.1475</b> , 517.3561, 311.1669, 183.0117, 96.9590                                                            | 229      | C <sub>15</sub> H <sub>21</sub> O <sub>4</sub>  |
| 10                    | Vanillic acid glucoside                    | 24.48          | 329.2294 | <b>329.2326</b> , 253.2153, 187.0959, 171.1025, 152.9954, 125.0953                                                 | 229      | C <sub>18</sub> H <sub>35</sub> O <sub>5</sub>  |
| <b>Flavonoids</b>     |                                            |                |          |                                                                                                                    |          |                                                 |
| 11                    | (Epi)catechin-(epi)catechin                | 22.24          | 575.1392 | <b>575.1748</b> , 285.0396, 301.0350, 257.0447                                                                     | 229      | C <sub>30</sub> H <sub>23</sub> O <sub>12</sub> |
| 12                    | Acacetin rhamnoside                        | 8.02           | 429.0858 | <b>151.0260</b> , 429.0883, 283.0690                                                                               | 229; 271 | C <sub>14</sub> H <sub>21</sub> O <sub>15</sub> |
| 13                    | Quercetin*                                 | 12.13          | 301.0920 | <b>95.0498</b> , 139.0387, 152.0120, 301.0875, 161.0395, 71.0147                                                   | 229; 279 | C <sub>13</sub> H <sub>9</sub> O <sub>7</sub>   |
| 14                    | 4'-Methoxyluteolin-8-C-β-D-glucopyranoside | 14.66          | 461.1633 | <b>101.0237</b> , 269.1015, 195.0653, 161.0461, 71.0105                                                            | 229      | C <sub>19</sub> H <sub>9</sub> O <sub>14</sub>  |
| 15                    | Kaempferol 3,7,4'-O-triglucoside           | 18.22          | 761.2019 | <b>230.0652</b> , 336.1085, 161.0439, 147.0439, 59.0129                                                            | 229      | C <sub>33</sub> H <sub>40</sub> O <sub>21</sub> |
| 16                    | Luteolin-3-O-(6''-O-malonyl)-glucoside     | 26.31          | 533.3900 | <b>533.6756</b> , 327.2171, 287.0389, 179.0996, 161.0904, 111.6158, 101.0230                                       | 229      | -                                               |

| Stilbenes         |                |       |          |                                                                    |          |                                                 |
|-------------------|----------------|-------|----------|--------------------------------------------------------------------|----------|-------------------------------------------------|
| 17                | Piceatannol I  | 19.09 | 243.0652 | <b>243.0662</b> , 201.0544, 159.0457                               | 229; 282 | C <sub>6</sub> H <sub>15</sub> O <sub>23</sub>  |
| 18                | Piceatannol II | 21.98 | 243.0660 | <b>300.0239</b> , 285.0355, 265.0533, 161.0458, 133.0710, 113.0280 | 229      | C <sub>5</sub> H <sub>7</sub> O <sub>11</sub>   |
| Unknown compounds |                |       |          |                                                                    |          |                                                 |
| 19                | Unknown 1      | 9.62  | 219.0495 | <b>111.0078</b> , 173.0123, 67.0175                                | 229; 283 | C <sub>15</sub> H <sub>7</sub> O <sub>2</sub>   |
| 20                | Unknown 2      | 10.42 | 313.0933 | <b>101.0222</b> , 269.0965, 161.0469, 313.0930, 71.0126            | 229; 262 | C <sub>12</sub> H <sub>17</sub> O <sub>8</sub>  |
| 21                | Unknown 3      | 12.97 | 456.1484 | <b>119.0369</b> , 456.1532, 161.0421, 89.0225, 85.0304             | 229; 281 | -                                               |
| 22                | Unknown 4      | 13.35 | 355.1017 | <b>554.2530</b> , 165.0511, 161.0486, 139.0370, 113.0199           | 229      | C <sub>23</sub> H <sub>15</sub> O <sub>4</sub>  |
| 23                | Unknown 5      | 13.97 | 439.1762 | <b>163.0601</b> , 205.0735, 119.0329, 89.0236, 59.0139             | 229; 262 | C <sub>13</sub> H <sub>11</sub> O <sub>17</sub> |
| 24                | Unknown 6      | 14.84 | 340.1030 | <b>161.0436</b> , 281.1368, 113.0221, 101.0217                     | 229; 261 | -                                               |
| 25                | Unknown 7      | 15.22 | 486.1611 | <b>307.1017</b> , 440.1565, 163.0590, 125.0230, 103.0388, 59.0116  | 229      | -                                               |
| 25                | Unknown 8      | 19.91 | 455.2090 | <b>263.1495</b> , 161.0415, 101.0242, 89.0229, 59.0122             | 229      | C <sub>31</sub> H <sub>3</sub> O <sub>5</sub>   |
| 27                | Unknown 9      | 22.91 | 485.1211 | <b>485.1206</b> , 375.0853, 109.0279                               | 229; 326 | C <sub>35</sub> H <sub>17</sub> O <sub>3</sub>  |

\*Confirmed using a pure chemical standard;- = unknown or no records in literature sources to our knowledge. Literature sources and \*standards were used to corroborate existing observations. MS<sup>E</sup> fragments in bold type face refer to the base peak (the highest peak).
